# Supplementary material for: Predictors of Response to Hydroxyurea and Switch to Ruxolitinib in HU-Resistant Polycythaemia VERA Patients: A Real-World PV-NET Study
Source: MDPI journal article supplement (doi:10.3390/cancers15143706), 2023-07-21
Supplement: s1 [file s1]

**Supplementary Table S1.** Main patients' characteristics at diagnosis in patients with partial/no response to hydroxyurea (HU) who continued HU (HU-POOR) and who switched to ruxolitinib (HU-RUX).

| Characteristics                                                  | HU-POOR<br>(n. 283) | HU-RUX<br>(n. 114) | <i>p</i> value |
|------------------------------------------------------------------|---------------------|--------------------|----------------|
| Age, median (range), years                                       | 66 (22-89)          | 62 (21-79)         | <0.001         |
| Age ≥ 65 years                                                   | 161 (56.9%)         | 45 (39.5%)         | <0.001         |
| Male sex, no. (%)                                                | 150 (53%)           | 70 (61.4%)         | 0.13           |
| <i>JAK2</i> <sup>V617F</sup> VAF ≥ 50%, no. (%) on 251 evaluable | 101/193<br>(52.3%)  | 34/58<br>(58.6%)   | 0.40           |
| Platelet count, median (range), x 10 <sup>9</sup> /L             | 436 (138-1070)      | 474 (143-1209)     | 0.21           |
| Leukocytes, median (range), x 10 <sup>9</sup> /L                 | 10 (1-27.3)         | 10.4 (4.2-25.6)    | 0.28           |
| Hemoglobin, median (range), g/dL                                 |                     |                    |                |
| Male                                                             | 18.6 (12-23.4)      | 18.6 (13.4-23)     | 0.36           |
| Female                                                           | 17.5 (13.2-21.9)    | 17.5 (13.8-20.5)   | 0.84           |
| Haematocrit, median (range), %                                   |                     |                    |                |
| Male                                                             | 56 (40.5-73)        | 56.8 (38-70)       | 0.71           |
| Female                                                           | 54.4 (42.6-72)      | 54 (39-65.8)       | 0.97           |
| Palpable spleen, no. (%) of 383 evaluable                        | 97/277 (35%)        | 54/106<br>(50.9%)  | 0.004          |
| Pruritus, no. (%)                                                | 95 (33.6%)          | 65 (57%)           | <0.001         |
| BMI ≥ 25, % of 284 evaluable                                     | 102/213<br>(47.9%)  | 42/71<br>(59.2%)   | 0.10           |
| Charlson comorbidity index (CCI) ≥ 1, no. (%)                    | 114 (40.3%)         | 46 (40.4%)         | 0.99           |
| At least one CVRF, no. (%)                                       | 240 (80.8%)         | 85 (68.6%)         | 0.002          |
| Thromboses pre-/at diagnosis, no. (%)                            | 72 (25.4%)          | 30 (26.3%)         | 0.86           |
| Antiplatelet agents, no (%)                                      | 223 (78.8%)         | 84 (73.7%)         | 0.14           |

**Supplementary Table S2.** Causes of death in patients with complete response to hydroxyurea (HU-CR) and in patients with partial/no response to hydroxyurea who continued HU (HU-POOR) and who switched to ruxolitinib (HU-RUX).

|                  | PV Cohort (n.563) |                                              | HU-CR (n.166) |                                              | HU-POOR (n.283) |                                              | HU-RUX (n.114) |                                              |
|------------------|-------------------|----------------------------------------------|---------------|----------------------------------------------|-----------------|----------------------------------------------|----------------|----------------------------------------------|
| Causes of death  | n.                | Incidence rate<br>(per 100<br>patient-years) | n.            | Incidence rate<br>(per 100<br>patient-years) | n.              | Incidence rate<br>(per 100<br>patient-years) | n.             | Incidence rate<br>(per 100<br>patient-years) |
| Blast Phase      | 7                 | 0.26                                         | 4             | 0.53                                         | 3               | 0.25                                         | 0              | 0                                            |
| Myelofibrosis    | 4                 | 0.15                                         | 2             | 0.27                                         | 2               | 0.17                                         | 0              | 0                                            |
| Infection        | 5                 | 0.15                                         | 1             | 0.13                                         | 3               | 0.25                                         | 1              | 0.14                                         |
| Second neoplasia | 9                 | 0.34                                         | 5             | 0.66                                         | 4               | 0.33                                         | 0              | 0                                            |
| Thrombosis       | 1                 | 0.04                                         | 0             | 0                                            | 1               | 0.08                                         | 0              | 0                                            |
| Other cause      | 10                | 0.38                                         | 3             | 0.40                                         | 7               | 0.59                                         | 0              | 0                                            |
